# Supplementary material
Source: ML conference proceedings conference paper supplement (https://proceedings.neurips.cc/paper_files/paper/2021/hash/aad64398a969ec3186800d412fa7ab31-Abstract.html)
Supplement: Supplementary file 1 [file aad64398a969ec3186800d412fa7ab31-Supplemental.zip]

Archive with 26 entries (22 files):
- NeurIPS2021_amLDS_supp/
- NeurIPS2021_amLDS_supp/.DS_Store
- __MACOSX/NeurIPS2021_amLDS_supp/._.DS_Store
- NeurIPS2021_amLDS_supp/NeurIPS2021_amLDS_appendix.pdf
- __MACOSX/NeurIPS2021_amLDS_supp/._NeurIPS2021_amLDS_appendix.pdf
- NeurIPS2021_amLDS_supp/Code/
- NeurIPS2021_amLDS_supp/Code/amLDS_Performance_DataDemands_ModelComparison.py
- __MACOSX/NeurIPS2021_amLDS_supp/Code/._amLDS_Performance_DataDemands_ModelComparison.py
- NeurIPS2021_amLDS_supp/Code/.DS_Store
- __MACOSX/NeurIPS2021_amLDS_supp/Code/._.DS_Store
- NeurIPS2021_amLDS_supp/Code/funs/
- NeurIPS2021_amLDS_supp/Code/amLDS_mixturesConcentration.html
- __MACOSX/NeurIPS2021_amLDS_supp/Code/._amLDS_mixturesConcentration.html
- NeurIPS2021_amLDS_supp/Code/README.md
- NeurIPS2021_amLDS_supp/Code/.ipynb_checkpoints/
- NeurIPS2021_amLDS_supp/Code/amLDS_example.ipynb
- NeurIPS2021_amLDS_supp/Code/amLDS_example.html
- __MACOSX/NeurIPS2021_amLDS_supp/Code/._amLDS_example.html
- NeurIPS2021_amLDS_supp/Code/amLDS_mixturesConcentration.ipynb
- NeurIPS2021_amLDS_supp/Code/funs/CCA_utils.py
- NeurIPS2021_amLDS_supp/Code/funs/figs.png
- __MACOSX/NeurIPS2021_amLDS_supp/Code/funs/._figs.png
- NeurIPS2021_amLDS_supp/Code/funs/amLDS_engine.py
- NeurIPS2021_amLDS_supp/Code/funs/TL_FA.py
- NeurIPS2021_amLDS_supp/Code/funs/amLDS_utils.py
- NeurIPS2021_amLDS_supp/Code/funs/FAprocrustes_utils.py
