# Supplementary material
Source: ML conference proceedings conference paper supplement (https://proceedings.neurips.cc/paper_files/paper/2021/hash/aad64398a969ec3186800d412fa7ab31-Abstract.html)
Supplement: Supplementary file 1 [file aad64398a969ec3186800d412fa7ab31-Supplemental.zip › NeurIPS2021_amLDS_supp/Code/README.md]

# Across-animal odor decoding byprobabilistic manifold alignment

This repository is the official implementation of aligned mixture of latent dynamical systems (amLDS) published in xxx.

amLDS is a probabilistic method to align neural responses and efficiently decode stimuli across animals. It learns independent mappings of different recordings into a shared latent manifold, where stimulus-evoked dynamics are similar across animals but distint across stimuli allowing for accurate stimulus decoding. 

## Requirements

* numpy == 1.16.2
* matplotlib == 3.0.3
* seaborn == 0.9.0
* sklearn == 0.20.3
* scipy == 1.2.1
* python == 3.7.3+

## Usage

To get started, run the example notebook 'amLDS_example.ipynb'. This notebook contains an example on the use of amLDS on synthetic data. It shows how to perform parameter learning, inference and stimulus decoding; as well as latent dimensionality estimation.

To explore other properties and capabilities of amLDS check the 'amLDS_mixturesConcentration.ipynb' notebook or run the performance script as 'python3 amLDS_Performance_DataDemands_ModelComparison.py'. 
